# Supplementary material
Source: publisher figshare collection journal article supplement (https://acs.figshare.com/ndownloader/files/17501864)
Supplement: Supplementary file 1 [file 17501864]

# Supporting Information

## Infrared Detectable MoS<sub>2</sub> Phototransistor and Its Application to Artificial Multi-Level Optic-Neural Synapse

Seung-Geun Kim<sup>†</sup>, Seung-Hwan Kim<sup>‡</sup>, June Park<sup>§</sup>, Gwang-Sik Kim<sup>‡</sup>, Jae-Hyeun Park<sup>‡</sup>, Krishna C. Saraswat<sup>||</sup>, Jiyoung Kim<sup>⊥</sup>, and Hyun-Yong Yu<sup>†,‡,\*</sup>

<sup>†</sup>Department of Semiconductor Systems Engineering, Korea University, 145, Anam-ro, Seongbuk-gu, Seoul, 02841, Korea

<sup>‡</sup>School of Electrical Engineering, Korea University, 145, Anam-ro, Seongbuk-gu, Seoul, 02841, Korea

<sup>§</sup>Department of Nano Semiconductor Engineering, Korea University, 145, Anam-ro, Seongbuk-gu, Seoul, 02841, Korea

<sup>||</sup> Department of Electrical Engineering, Stanford University, Stanford, CA, 94305, USA

<sup>⊥</sup> Department of Materials Science and Engineering, The University of Texas at Dallas, Richardson, Texas, 75080, USA

\* Address correspondence to [yuhykr@korea.ac.kr](mailto:yuhykr@korea.ac.kr)

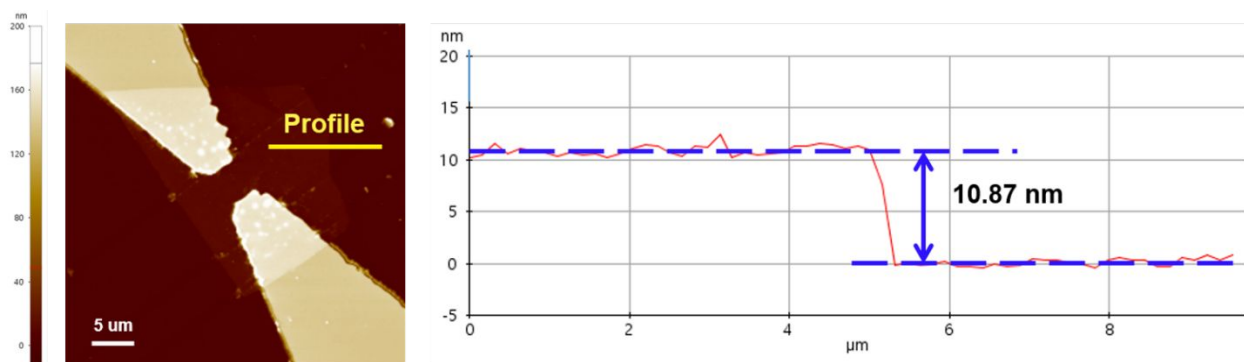

**Figure S1. AFM image and height profile of the MoS<sub>2</sub> flake.** Figure S1 shows AFM image and height profile of the MoS<sub>2</sub> flake used in this work. The thickness of the MoS<sub>2</sub> flake was measured as approximately 10.87 nm, which corresponds to approximately 15 layers of MoS<sub>2</sub>, because the thickness of one layer was 0.6–0.7 nm.

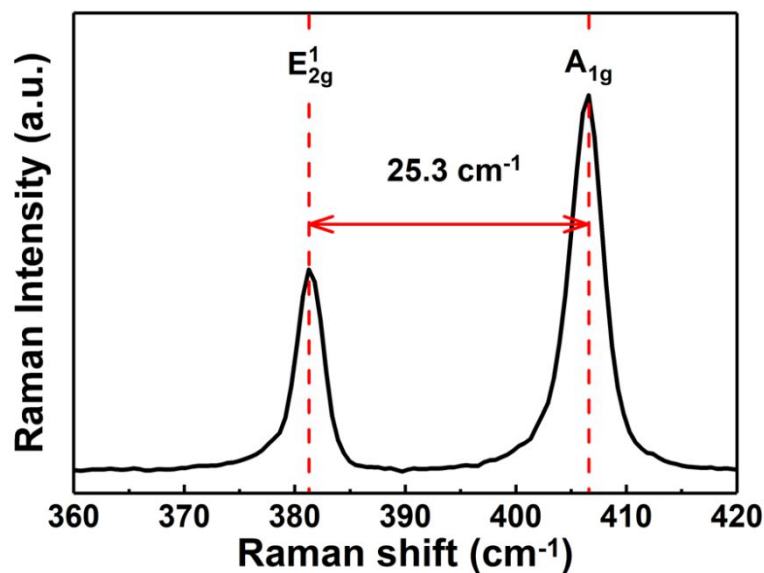

**Figure S2. Raman spectra of the exfoliated MoS<sub>2</sub> flake.** Two different Raman peaks were observed near 381.3 and 406.6 cm<sup>-1</sup> under excitation by a 532 nm line, as shown in Figure S2. For comparison with a previous report, the MoS<sub>2</sub> flake used in this work had >5 layers.

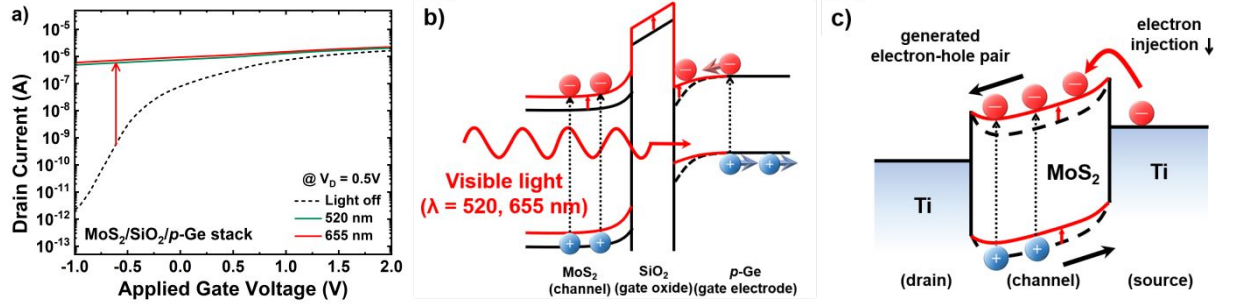

**Figure S3. a) Optical characterization of the Ge-gated MoS<sub>2</sub> phototransistor under visible light ( $\lambda = 520$  and  $655$  nm) and the energy band diagrams for b) the vertical direction and c) the horizontal direction.** In contrast to the optical characteristics under infrared light, the  $I_D$  increased by a factor of  $>1000$  at  $V_G = -0.5$  V and  $V_D = -0.5$  V under visible light, as shown in Figure S3a. This is explained by the band diagrams. When the visible light was incident onto the device, electron-hole pairs were generated in both the Ge gate and the MoS<sub>2</sub> channel, as shown in Figure S3b. The electron-hole pairs generated in the Ge gate obstructed the current conduction through the MoS<sub>2</sub> channel by modulating the electrostatic potential of the channel at the same gate bias. However, the electron-hole pairs generated in the MoS<sub>2</sub> channel induced a large photocurrent, increasing the drain current. Although the two mechanisms yielded opposite results in the current-conduction characteristics of the phototransistor, a large increase in  $I_D$  was observed, because the induced photocurrent at the MoS<sub>2</sub> channel was the dominant factor, as shown in Figure S3c.

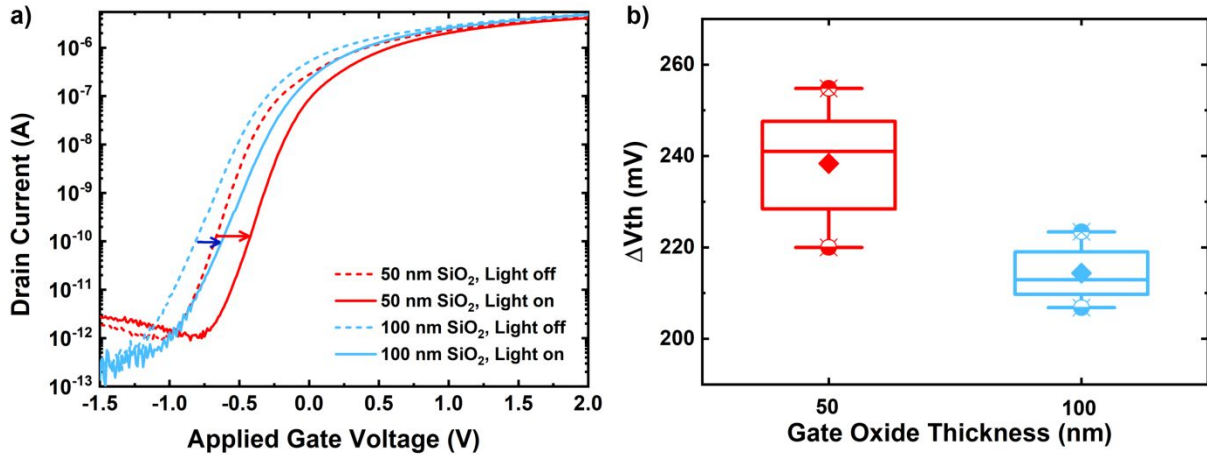

**Figure S4. a) Electrical transfer curves of the Ge-gated MoS<sub>2</sub> phototransistor with 50 and 100 nm-thick SiO<sub>2</sub>. b) An amount of threshold voltage shifting versus gate oxide thickness.** An average amount of threshold voltage shifting by irradiated infrared light decreases from 238 mV to 214 mV as the thickness of SiO<sub>2</sub> increases inducing the capacitance reduction.

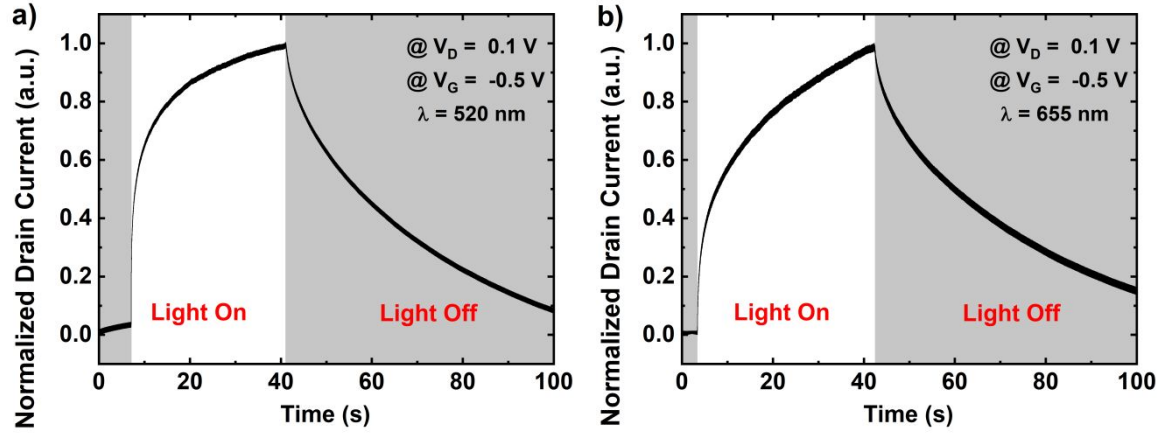

**Figure S5. Temporal responses of the device a) under 520 nm light and b) 655 nm light at a  $V_D$  of 0.1 V and a  $V_G$  of -0.5 V.** The normalized drain current is plotted as a function of measurement time durations and the rising and decaying time values can be extracted between 10% and 90% of the increasing and decreasing drain current, respectively. The responses to the visible light are similar to the results of previous studies: the rising time is 15.67 s for  $\lambda = 520$  nm and 28.67 s for  $\lambda = 655$  nm, and the decay time is 52.91 s for  $\lambda = 520$  nm and 61.33 s for  $\lambda = 655$  nm.

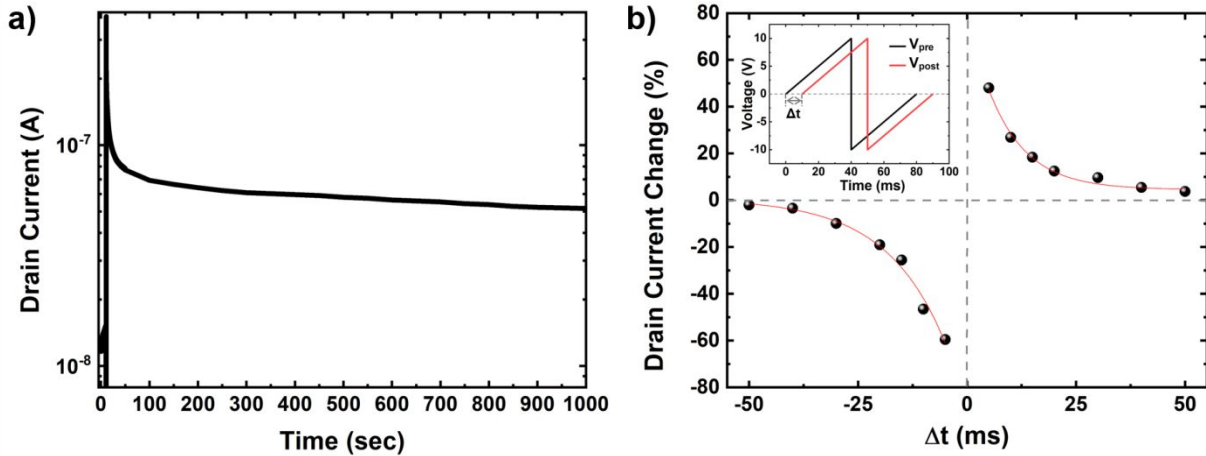

**Figure S6. Basic synaptic behaviors of Ge-gated  $\text{MoS}_2$  phototransistor. a) Synaptic currents triggered by a single gate pulse. b) Spike-timing-dependent plasticity (STDP) behavior.** Figure S6a shows the decay of synaptic currents triggered by a single gate pulse of -30 V in amplitude and 50 ms in duration. Figure S6b shows the STDP behavior of the device. The drain current change ( $\Delta I/I_0$ ) measured at  $V_D = 0.5$  V after presynaptic and postsynaptic spikes are applied with a time difference,  $\Delta t = t_{post} - t_{pre}$ , where  $t_{post}$  and  $t_{pre}$  are the time when the presynaptic and postsynaptic pulses spike, respectively. If the presynaptic spike occurs before the postsynaptic spike ( $\Delta t > 0$ ), the device undergoes a potentiation. And, if the postsynaptic spike occurs before the presynaptic spike ( $\Delta t < 0$ ), the device undergoes a depression.

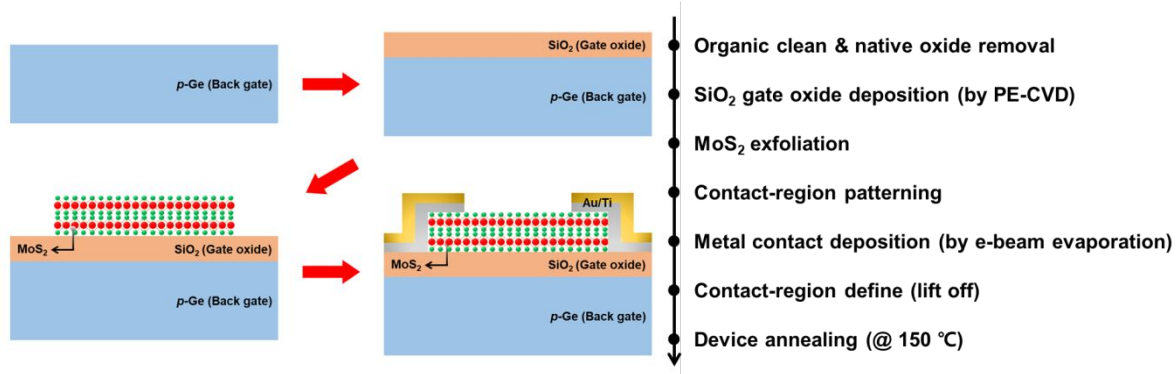

**Figure S7. Schematics showing the fabrication process for the MoS<sub>2</sub>/SiO<sub>2</sub>/Ge phototransistor.** To use p-Ge for the back-gate electrode, the conventional gate oxide, SiO<sub>2</sub>, was deposited on the Ge substrate *via* PE-CVD. The few-layer MoS<sub>2</sub> was exfoliated using PDMS tape *via* the micromechanical exfoliation method, because PDMS tape is effective for obtaining large and uniform flakes.

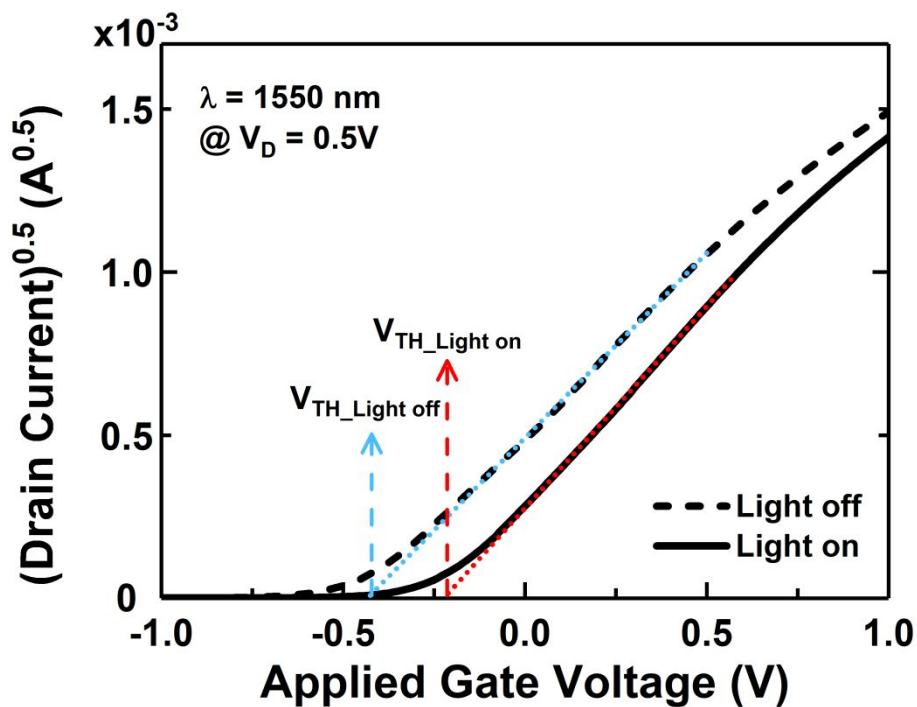

**Figure S8.  $I_D^{0.5}$ – $V_G$  characteristics of the device for extracting the threshold voltage.** The threshold voltage was calculated using the equation  $I_D = K(V_G - V_{TH})^2$ , where  $I_D$  is the drain current,  $K$  is a constant,  $V_G$  is the applied gate voltage, and  $V_{TH}$  is the threshold voltage. Thus, in the square root of the drain-current curve as a function of applied gate voltage, the  $V_{TH}$  is derived by the x-intercept points of the tangential lines in the linear region of the curves.
